# Supplementary material
Source: PubMed Central journal article supplement (PMC11028309)
Supplement: 262_2018_2116_MOESM1_ESM.pdf [file 262_2018_2116_MOESM1_ESM.pdf]

## Supplementary Fig. 1

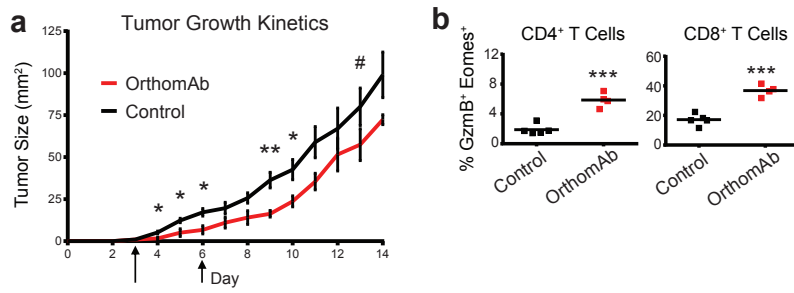

**Supplementary Fig. 1** OrthomAb elicits tumor immunity. B6 mice were injected intradermally with  $1 \times 10^5$  B16-F10 tumor cells on day 0, and on days 3 and 6 (refer to arrows) given 150  $\mu$ g isotype control conjugate (Control) or OrthomAb.  $N=4-5$  per group. **a** Daily tumor sizes (mm<sup>2</sup>). \* indicates significance on a given day, and # indicates significance for area under the curve values through day 13. **b** Scatter plots of the % of CD4<sup>+</sup> (left) and CD8<sup>+</sup> (right) TIL that were GzmB<sup>+</sup>Eomes<sup>+</sup> by flow cytometry.
